# Supplementary material
Source: publisher figshare collection journal article supplement (https://acs.figshare.com/ndownloader/files/10060303)
Supplement: Supplementary file 1 [file 10060303]

## Supporting Information

### Increases of Total Mercury and Methylmercury Releases from Municipal Sewage into Environment in China and Implications

Maodian Liu<sup>†‡</sup>, Peng Du<sup>†</sup>, Chenghao Yu<sup>†</sup>, Yipeng He<sup>†‡</sup>, Haoran Zhang<sup>†</sup>, Xuejun Sun<sup>§⊥</sup>, Huiming Lin<sup>†</sup>, Yao Luo<sup>†</sup>, Han Xie<sup>†</sup>, Junming Guo<sup>‡</sup>, Yindong Tong<sup>#</sup>, Qianggong Zhang<sup>§∇</sup>, Long Chen<sup>◊</sup>, Wei Zhang<sup>¶</sup>, Xiqing Li<sup>†</sup>, Xuejun Wang<sup>†\*</sup>

<sup>†</sup>Ministry of Education Laboratory of Earth Surface Process, College of Urban and Environmental Science, Peking University, Beijing 100871, China

<sup>‡</sup>Department of Marine Sciences, University of Connecticut, 1080 Shennecossett Rd., Groton, CT 06340, USA

<sup>§</sup>Key Laboratory of Tibetan Environment Changes and Land Surface Processes, Institute of Tibetan Plateau Research, Chinese Academy of Sciences, Beijing 100101, China

<sup>⊥</sup>Graduate University of the Chinese Academy of Sciences, Beijing 100049, China

<sup>‡</sup>State Key Laboratory of Cryospheric Science, Northwest Institute of Eco-Environment and Resources, Chinese Academy of Sciences, Lanzhou 730000, China

<sup>#</sup>School of Environmental Science and Engineering, Tianjin University, Tianjin 300072, China

<sup>∇</sup>Chinese Academy of Sciences Center for Excellence in Tibetan Plateau Earth Sciences, Beijing 100101, China

<sup>◊</sup>Key Laboratory of Geographic Information Science (Ministry of Education), East China Normal University, Shanghai 200241, China

<sup>◆</sup>School of Geographic Sciences, East China Normal University, Shanghai 200241, China

<sup>¶</sup>School of Environment and Natural Resources, Renmin University of China, Beijing 100872, China

#### Corresponding authors:

*Xuejun Wang*. Ministry of Education Laboratory of Earth Surface Processes, College of Urban and Environmental Sciences, Peking University, Beijing 100871, China. Tel: +86-10-62759190. E-mail: [xjwang@urban.pku.edu.cn](mailto:xjwang@urban.pku.edu.cn)

Number of Pages: 21

Number of Supporting Figures: 10

Number of Supporting Tables: 2

## Supporting Figures

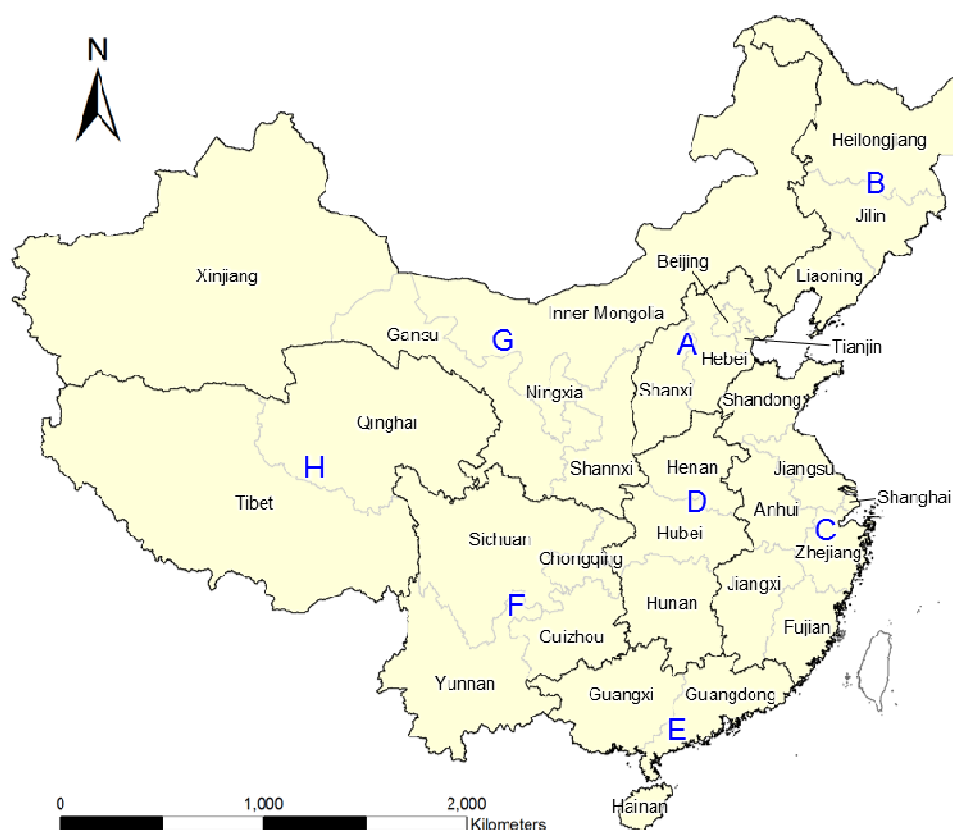

**Figure S1.** Eight regions in China. A is North China, B is Northeast China, C is East China, D is Central China, E is South China, F is Southwest China, G is Northwest China, and H is Tibetan region. South China Sea isn't included in the map.

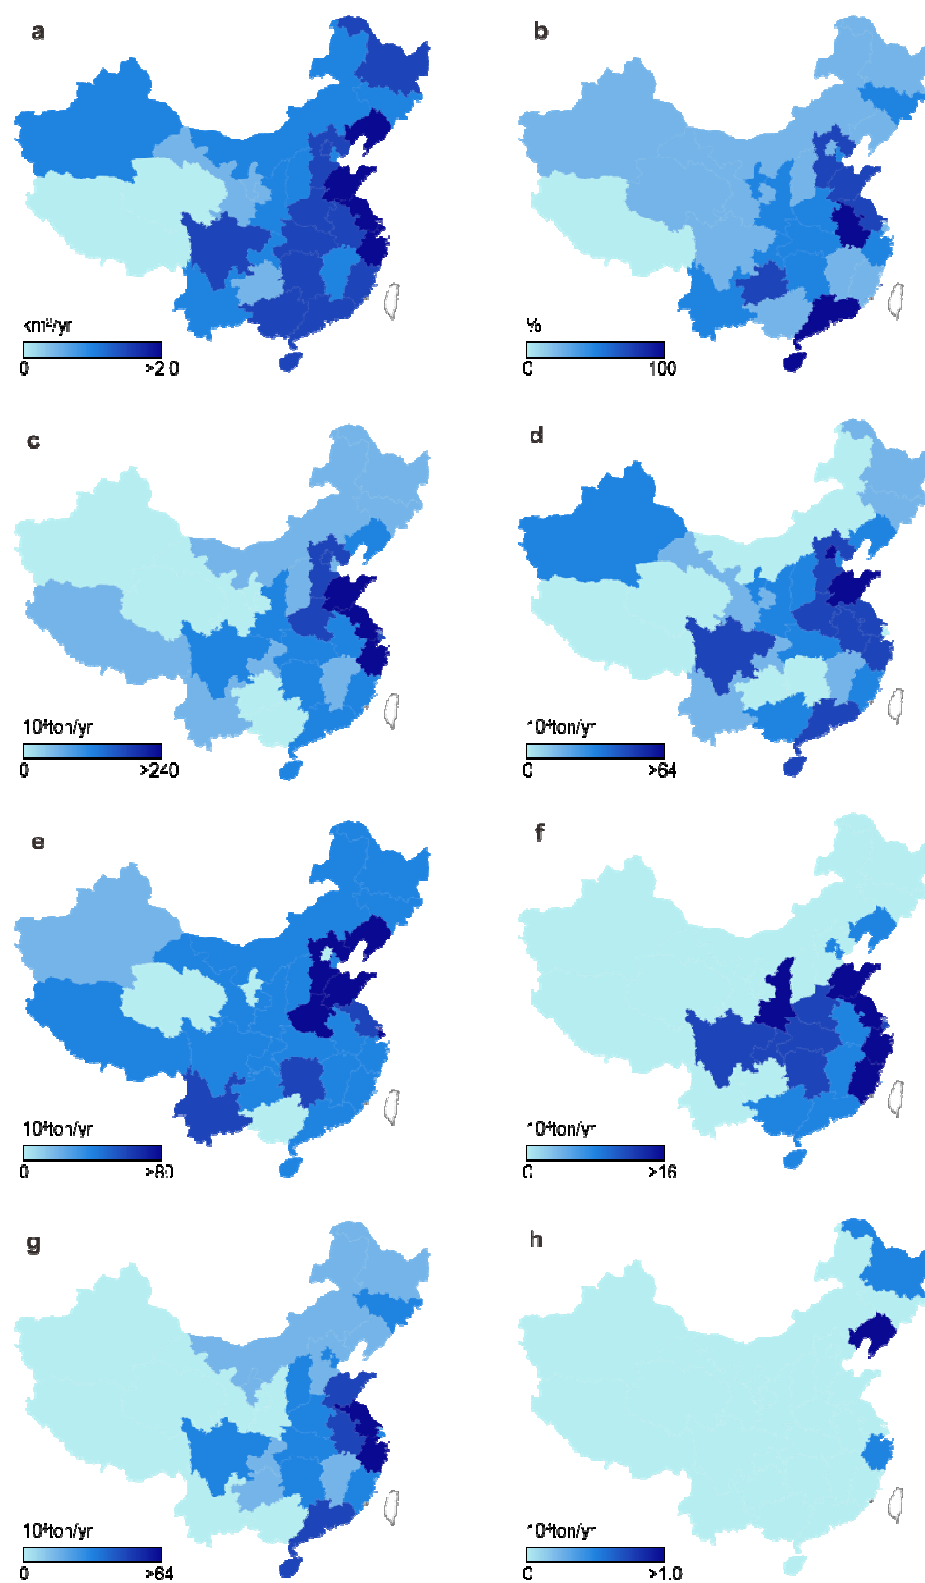

**Figure S2.** Basic data associated with the life cycle of municipal sewage in China in

2015 used in the material flow analysis. **a** is generation of municipal sewage in each province of China (*China Environmental Statistical Yearbook*);<sup>1</sup> **b** is treatment ratio of municipal sewage (*China Environmental Statistical Yearbook*); **c** is generation of sewage sludge (*China Environment Yearbook*);<sup>2</sup> **d** is sewage sludge discharged into landfill (*China Environment Yearbook*); **e** is sewage sludge discharged into cropland (*China Environment Yearbook*); **f** is sewage sludge used for building materials (*China Environment Yearbook*); **g** is incineration of sewage sludge (*China Environment Yearbook*); **h** is sewage sludge irregularly dumped into natural land (*China Environment Yearbook*).

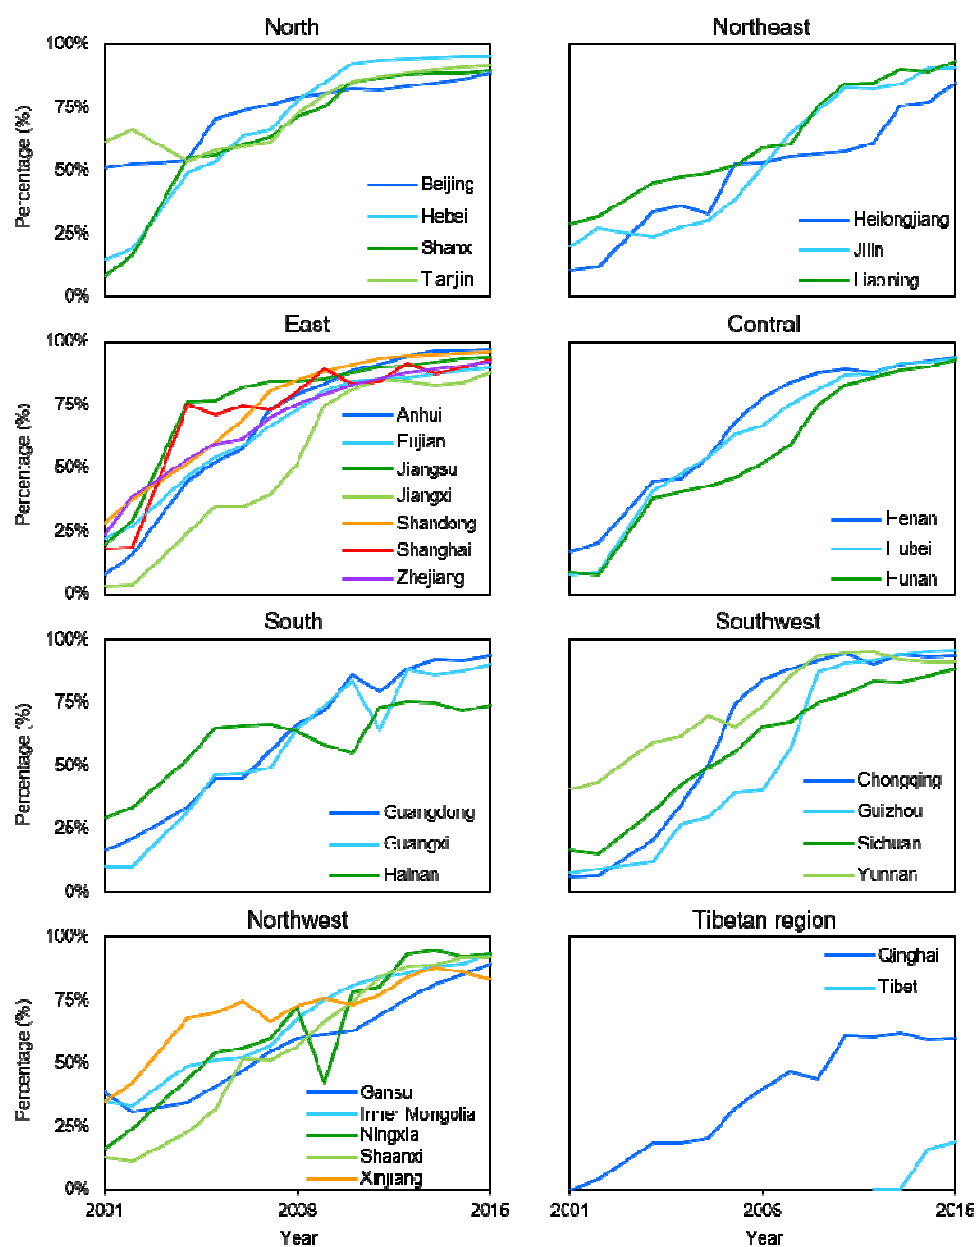

**Figure S3.** Trend of treatment ratio of municipal sewage of each province from 2001 to 2015. Data are referenced from the *China Environmental Statistical Yearbook*.<sup>1</sup>

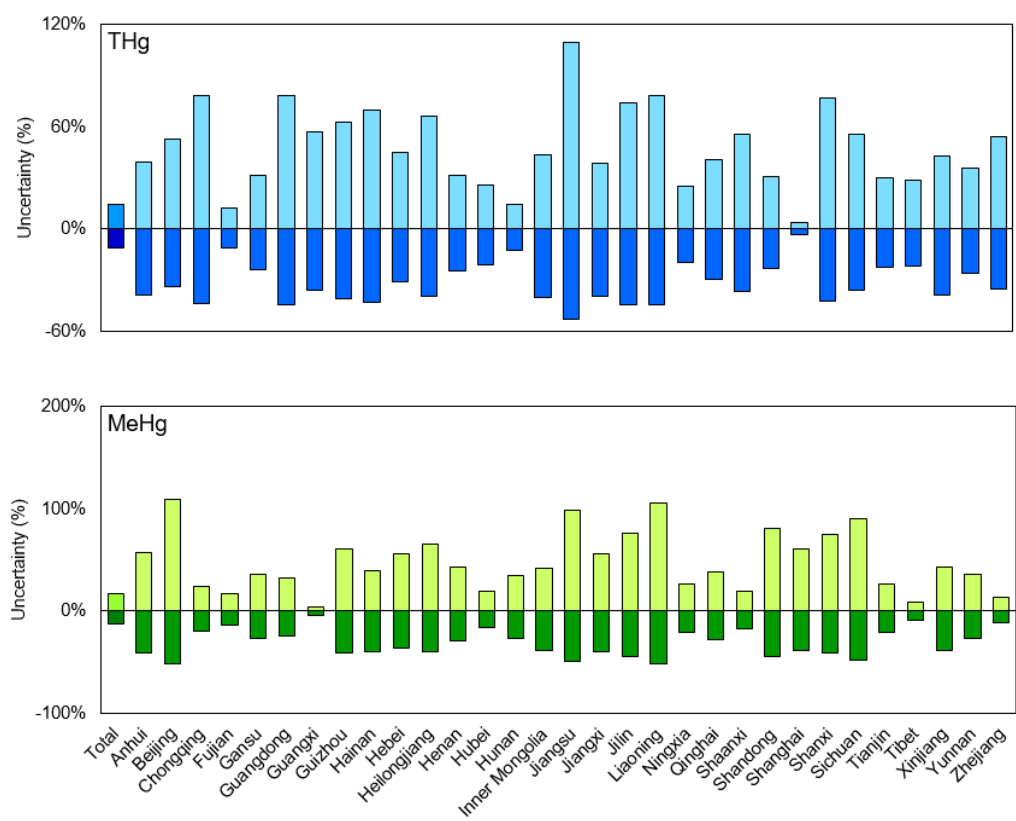

**Figure S4.** Uncertainties (P20-80 confidence interval) of THg and MeHg released from municipal sewage of each province in China in 2015.

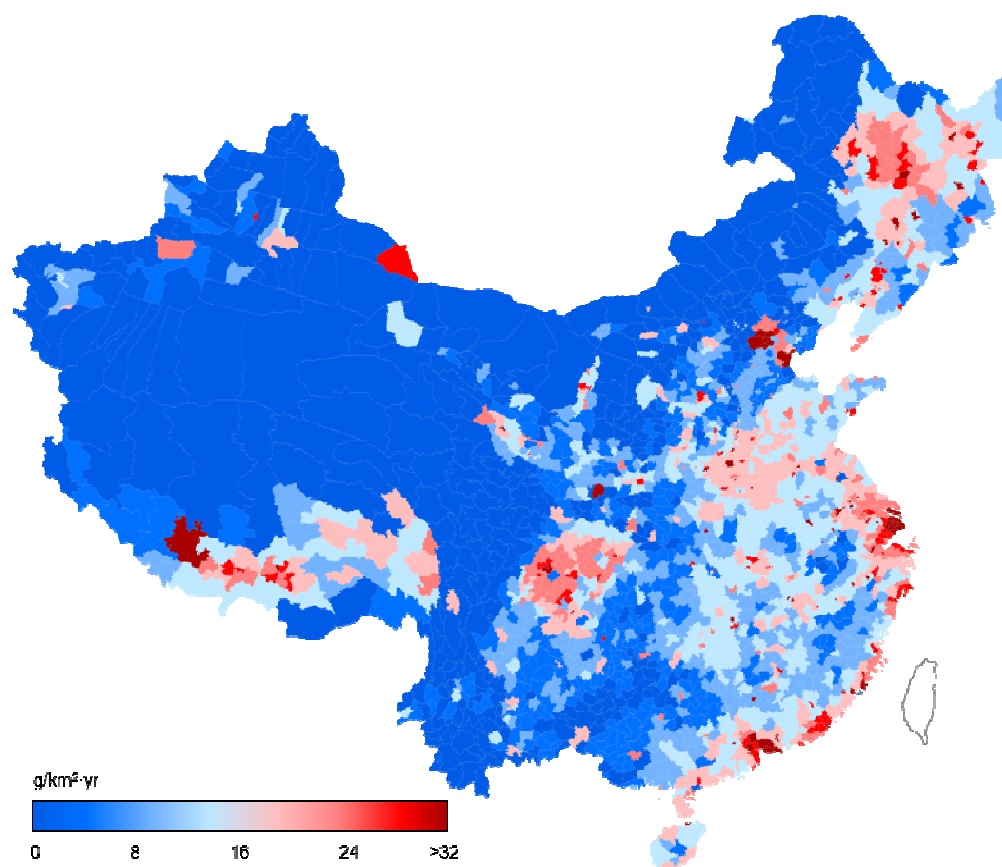

**Figure S5.** Distribution of THg released from municipal sewage into aquatic environment in China in 2015.

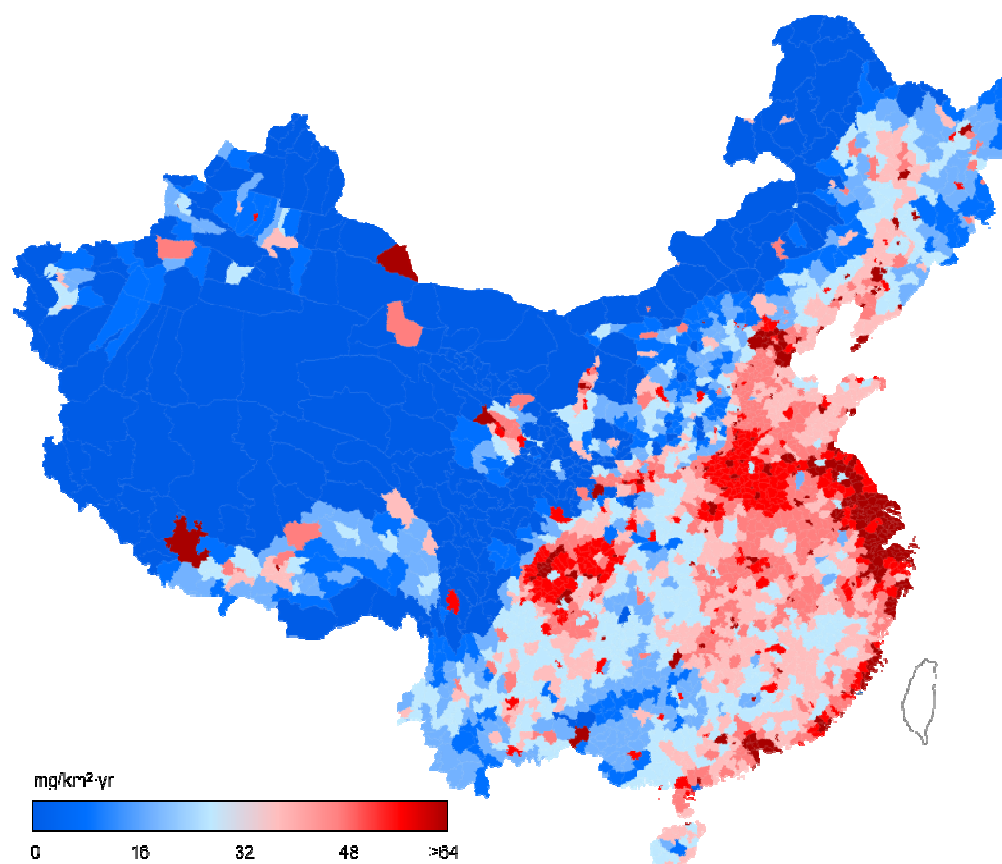

**Figure S6.** Distribution of MeHg released from municipal sewage into aquatic environment in China in 2015.



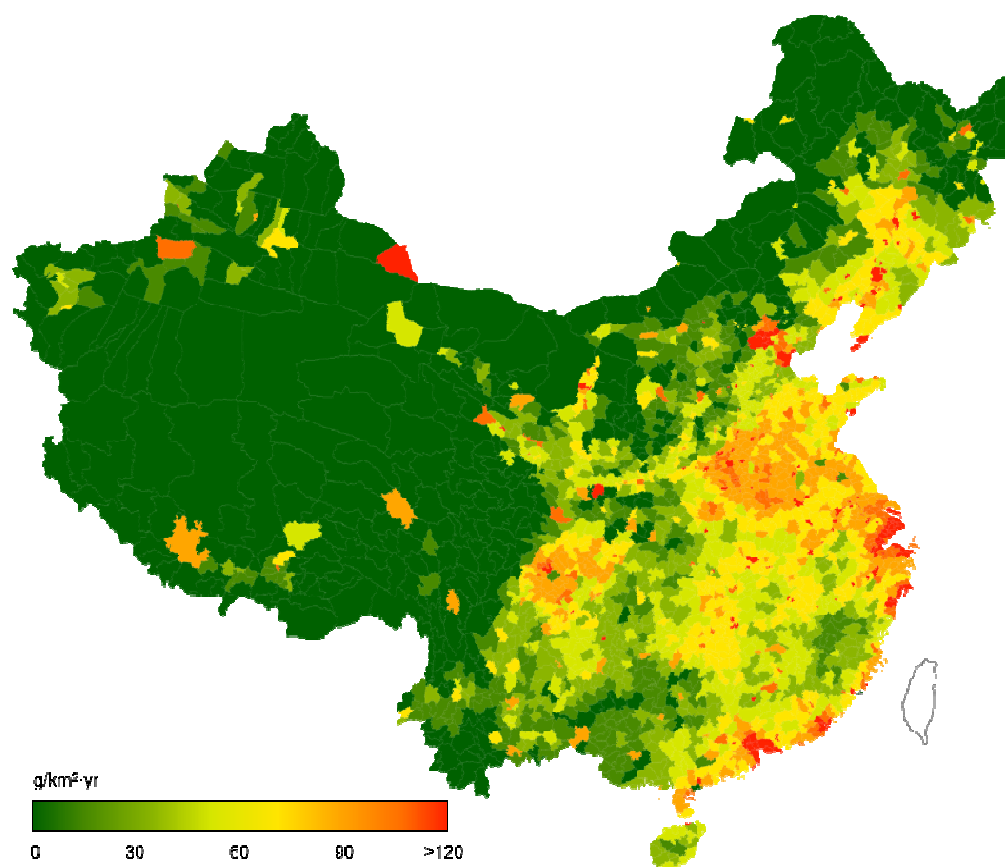

**Figure S7.** Distribution of THg released from municipal sewage into land in China in 2015.

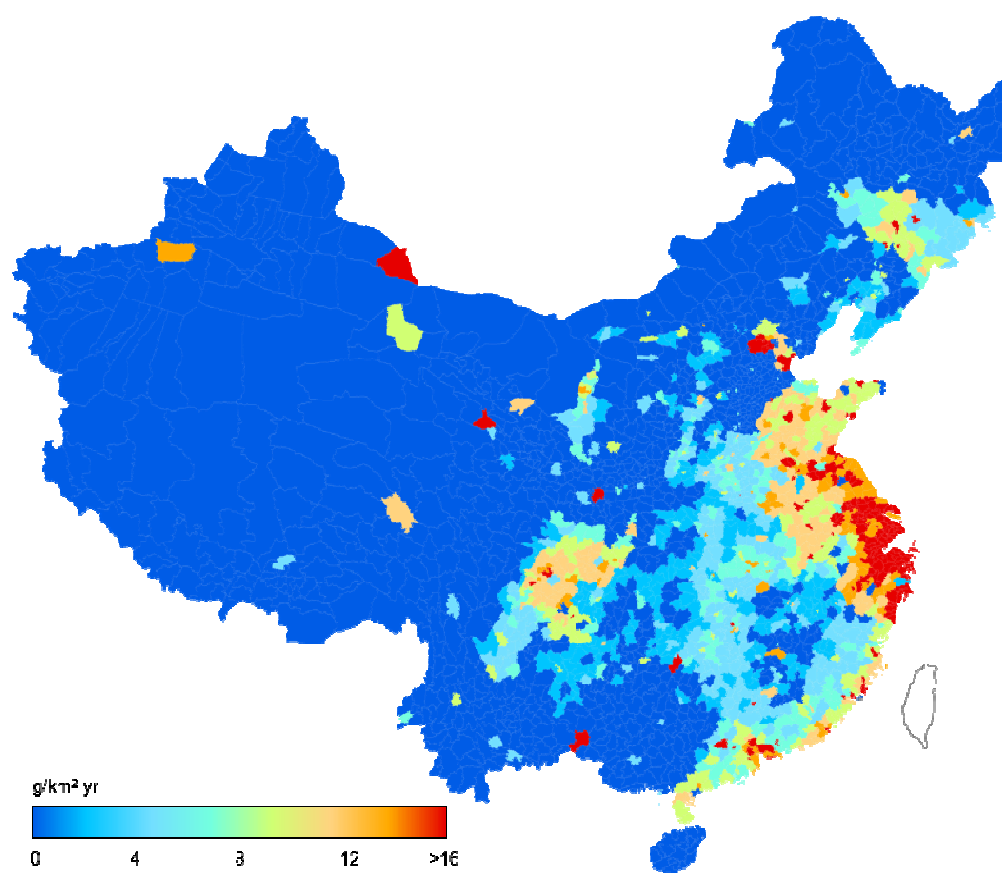

**Figure S8.** Distribution of THg emitted from municipal sewage into atmosphere in China in 2015.

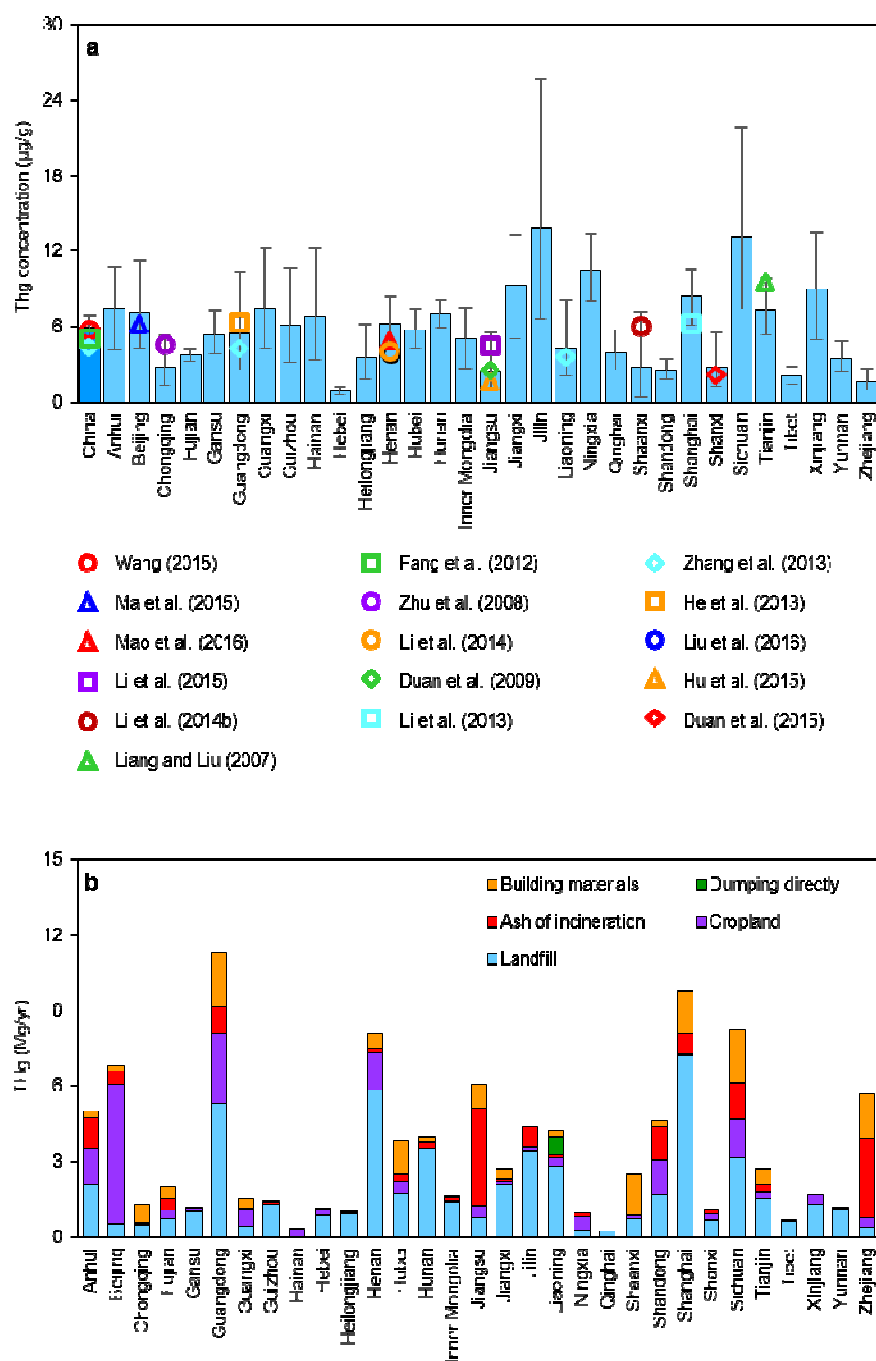

**Figure S9.** Modeling results of THg concentration in sewage sludge and compared with measurement data from published literatures (a), and THg released from municipal sewage into different sinks of land in each province in China in 2015 (b). Column and bar in figure a are median value and P20-80 confidence interval,

respectively. Measurement data are referenced from Wang (2015),<sup>3</sup> Fang et al. (2012),<sup>4</sup> Zhang et al. (2013),<sup>5</sup> Ma et al. (2015),<sup>6</sup> Zhu et al. (2008),<sup>7</sup> He et al. (2013),<sup>8</sup> Mao et al. (2016),<sup>9</sup> Li et al. (2014a),<sup>10</sup> Liu et al. (2016),<sup>11</sup> Li et al. (2015),<sup>12</sup> Duan et al. (2009),<sup>13</sup> Hu et al. (2015),<sup>14</sup> Li et al. (2014b),<sup>15</sup> Li et. (2013),<sup>16</sup> Duan et al. (2015),<sup>17</sup> Liang and Liu (2007).<sup>18</sup>

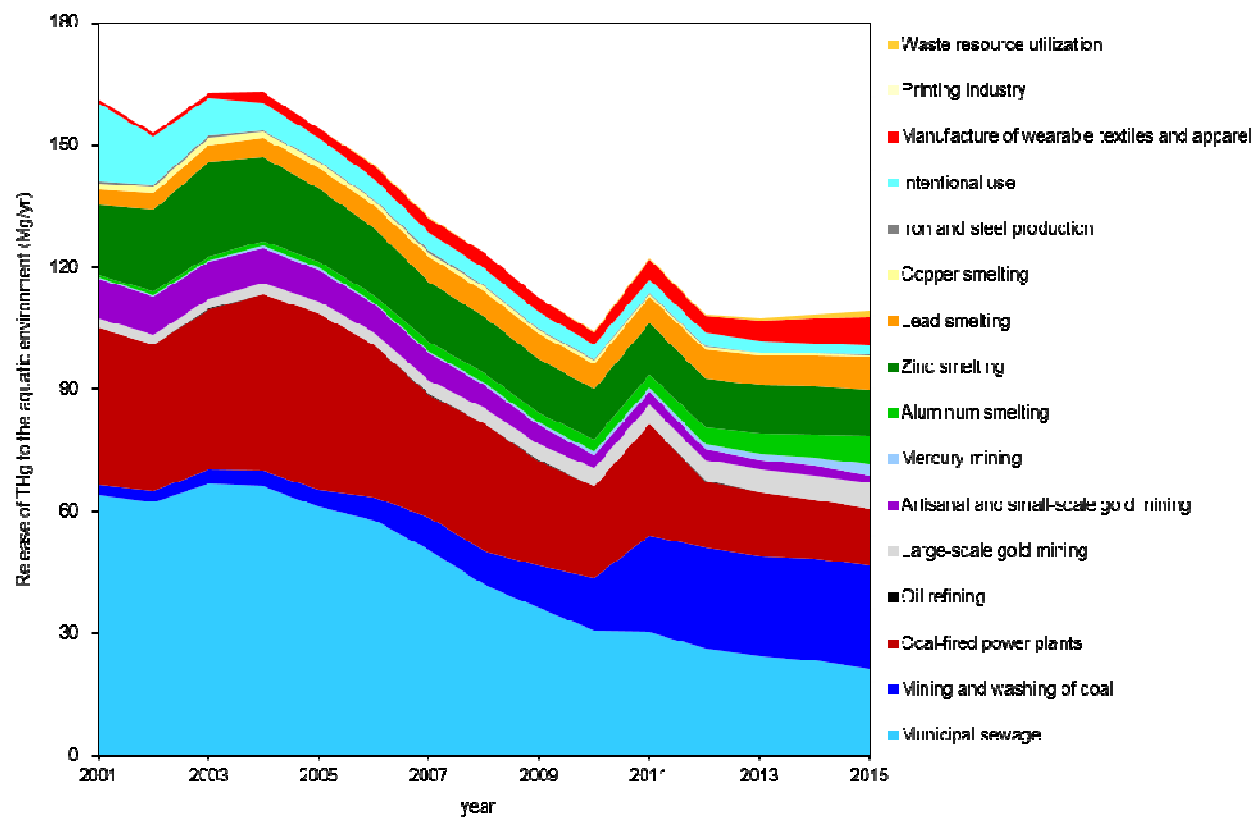

**Figure S10.** Updates of THg released from direct anthropogenic sources in China from 2001 to 2015.

## Supporting Tables

**Table S1.** Municipal sewage treatment plants and sampling information

| Region      | Province | MSTP <sup>a</sup> ID | Influent<br>(untreated<br>sewage) | Effluent<br>(treated<br>sewage) | Treatment<br>technology <sup>b</sup> | Sewage flow<br>(m <sup>3</sup> /d) | THg removal<br>ratio (%) | MeHg<br>removal ratio<br>(%) |
|-------------|----------|----------------------|-----------------------------------|---------------------------------|--------------------------------------|------------------------------------|--------------------------|------------------------------|
| North China |          |                      |                                   |                                 |                                      |                                    |                          |                              |
|             | Beijing  | CP-1                 | √ <sup>c</sup>                    | √                               | A <sup>2</sup> /O                    | 20,000                             | 98%                      | 91%                          |
|             | Beijing  | CP-2                 | √                                 | √                               | CAST                                 | 20,000                             | 94%                      | 90%                          |
|             | Beijing  | CY-1                 | √                                 | √                               | MBR                                  | 100,000                            | 100%                     | 97%                          |
|             | Beijing  | CY-2                 | √                                 | √                               | OD                                   | 40,000                             | 98%                      | 96%                          |
|             | Beijing  | CY-3                 | √                                 | √                               | A <sup>2</sup> /O                    | 600,000                            | 90%                      | 93%                          |
|             | Beijing  | CY-4                 | √                                 | √                               | OD                                   | 350,000                            | 88%                      | 73%                          |
|             | Beijing  | FT-1                 | √                                 | √                               | A <sup>2</sup> /O                    | 80,000                             | 93%                      | 89%                          |
|             | Beijing  | FT-2                 | √                                 | √                               | SBR                                  | 80,000                             | 99%                      | 91%                          |
|             | Beijing  | FT-3                 | √                                 | √                               | A <sup>2</sup> /O                    | 43,000                             | 93%                      | 95%                          |
|             | Beijing  | HD-1                 | √                                 | √                               | A <sup>2</sup> /O                    | 550,000                            | 100%                     | 90%                          |
|             | Beijing  | HD-2                 | √                                 | √                               | A <sup>2</sup> /O                    | 21,000                             | 96%                      | 99%                          |
|             | Beijing  | TZ-1                 | √                                 | √                               | ASP                                  | 950,000                            | 98%                      | 54%                          |
|             | Tianjin  | TG-1                 | √                                 | × <sup>d</sup>                  | A/O                                  | 64,000                             | n/a <sup>e</sup>         | n/a                          |
|             | Hebei    | SJZ-1                | √                                 | ×                               | A <sup>2</sup> /O                    | 490,000                            | n/a                      | n/a                          |
|             | Hebei    | SJZ-2                | √                                 | ×                               | ASP                                  | 160,000                            | n/a                      | n/a                          |
|             | Shanxi   | CZ-1                 | √                                 | √                               | OD                                   | 160,000                            | 85%                      | 90%                          |

|                 |       |   |   |                   |         |     |     |
|-----------------|-------|---|---|-------------------|---------|-----|-----|
| Shanxi          | TY-1  | ✓ | × | A <sup>2</sup> /O | 150,000 | n/a | n/a |
| Shanxi          | TY-2  | ✓ | × | A <sup>2</sup> /O | 70,000  | n/a | n/a |
| Northeast China |       |   |   |                   |         |     |     |
| Liaoning        | SY-1  | ✓ | ✓ | BAF               | 400,000 | 95% | 89% |
| Liaoning        | SY-2  | ✓ | × | BP                | 400,000 | n/a | n/a |
| Liaoning        | DL-1  | ✓ | × | CAST              | 80,000  | n/a | n/a |
| Liaoning        | DL-2  | ✓ | × | BAF               | 100,000 | n/a | n/a |
| Heilongjiang    | HEB-1 | ✓ | ✓ | A/O               | 140,000 | 99% | 97% |
| Heilongjiang    | HEB-2 | ✓ | ✓ | A/O               | 290,000 | 96% | 91% |
| Heilongjiang    | HEB-3 | ✓ | ✓ | CAST              | 27,000  | 96% | 85% |
| East China      |       |   |   |                   |         |     |     |
| Fujian          | XM-1  | ✓ | ✓ | BAF               | 260,000 | 87% | 86% |
| Fujian          | XM-2  | ✓ | ✓ | OD                | 190,000 | 96% | 54% |
| Jiangsu         | NJ-1  | ✓ | × | A <sup>2</sup> /O | 640,000 | n/a | n/a |
| Jiangsu         | NJ-2  | ✓ | × | SBR               | 58,000  | n/a | n/a |
| Jiangsu         | SZ-1  | ✓ | × | ASP               | 140,000 | n/a | n/a |
| Jiangsu         | SZ-2  | ✓ | × | ASP               | 110,000 | n/a | n/a |
| Jiangsu         | SZ-3  | ✓ | × | ASP               | 42,000  | n/a | n/a |
| Shandong        | JN-1  | ✓ | × | A <sup>2</sup> /O | 340,000 | n/a | n/a |
| Shanghai        | CN-1  | ✓ | ✓ | SO                | 75,000  | 99% | 96% |
| Shanghai        | HK-1  | ✓ | ✓ | A/O               | 52,000  | 96% | 66% |
| Zhejiang        | HZ-1  | ✓ | ✓ | A <sup>2</sup> /O | 380,000 | 94% | 78% |
| Central China   |       |   |   |                   |         |     |     |
| Henan           | LY-1  | ✓ | ✓ | A <sup>2</sup> /O | 190,000 | 96% | 78% |
| Henan           | LY-2  | ✓ | × | A <sup>2</sup> /O | 160,000 | n/a | n/a |
| Hubei           | WH-1  | ✓ | ✓ | A <sup>2</sup> /O | 300,000 | 95% | 86% |

|                 |           |       |   |   |                   |           |     |     |
|-----------------|-----------|-------|---|---|-------------------|-----------|-----|-----|
|                 | Hunan     | CS-1  | ✓ | ✓ | A <sup>2</sup> /O | n/a       | 97% | 70% |
| South China     |           |       |   |   |                   |           |     |     |
|                 | Guangdong | GZ-1  | ✓ | ✓ | A <sup>2</sup> /O | 1,200,000 | 96% | 88% |
|                 | Guangdong | SZ-1  | ✓ | × | A <sup>2</sup> /O | 750,000   | n/a | n/a |
|                 | Guangdong | SZ-2  | ✓ | × | A <sup>2</sup> /O | 290,000   | n/a | n/a |
|                 | Guangxi   | NN-1  | ✓ | × | ASP               | 310,000   | n/a | n/a |
|                 | Guangxi   | NN-2  | ✓ | × | ASP               | 290,000   | n/a | n/a |
| Southwest China |           |       |   |   |                   |           |     |     |
|                 | Chongqing | SPB-1 | ✓ | ✓ | BP                | 18,000    | 95% | 86% |
|                 | Sichuan   | CD-1  | ✓ | ✓ | BAF               | 210,000   | 93% | 87% |
|                 | Sichuan   | XC-1  | ✓ | ✓ | OD                | 42,000    | 94% | 91% |
|                 | Yunnan    | KM-1  | ✓ | ✓ | A <sup>2</sup> /O | 300,000   | 94% | 95% |
| Northwest China |           |       |   |   |                   |           |     |     |
|                 | Gansu     | LZ-1  | ✓ | × | A <sup>2</sup> /O | 50,000    | n/a | n/a |
|                 | Gansu     | LZ-2  | ✓ | × | ASP               | 170,000   | n/a | n/a |
|                 | Gansu     | LZ-3  | ✓ | × | SO                | 130,000   | n/a | n/a |
|                 | Gansu     | LZ-4  | ✓ | × | A <sup>2</sup> /O | 40,000    | n/a | n/a |
|                 | Ningxia   | YC-1  | ✓ | ✓ | SBR               | 100,000   | 97% | 93% |
|                 | Ningxia   | YC-2  | ✓ | ✓ | CAST              | 70,000    | 95% | 89% |
|                 | Ningxia   | YC-3  | ✓ | ✓ | A <sup>2</sup> /O | 200,000   | 93% | 81% |
|                 | Shannxi   | XA-1  | ✓ | ✓ | OOD               | 170,000   | 95% | 89% |
|                 | Shannxi   | XA-2  | ✓ | ✓ | A <sup>2</sup> /O | 380,000   | 95% | 89% |
|                 | Shannxi   | XA-3  | ✓ | ✓ | A <sup>2</sup> /O | n/a       | 97% | 92% |
| Tibetan region  |           |       |   |   |                   |           |     |     |
|                 | Qinghai   | XN-1  | ✓ | ✓ | A <sup>2</sup> /O | 74,000    | 97% | 93% |
|                 | Qinghai   | XN-2  | ✓ | ✓ | A <sup>2</sup> /O | 56,000    | 98% | 96% |



|       |      |   |   |     |        |     |     |
|-------|------|---|---|-----|--------|-----|-----|
| Tibet | LS-1 | ✓ | ✓ | n/a | 50,000 | 99% | 96% |
|-------|------|---|---|-----|--------|-----|-----|

Note: a) municipal sewage treatment plants; b) A/O: anoxic/oxic process, A<sup>2</sup>/O: anaerobic-anoxic-oxic process, ASP: activated sludge process, BAF: biological aerated filter, BP: biomembrance process, CAST: cyclic activated sludge technology, MBR: membrane Bio-Reactor, OD: oxidation ditch, SO: secondary oxidation, SBR: sequencing batch reactor, OOD: orbal oxidation ditch; c) have sample; d) no sample; e) not available.

**Table S2.** Comparison of THg and MeHg concentrations with previous studies

| Region                 | Influent (untreated sewage) |                              |                              | Effluent (treated sewage) |                 |                 | Reference                                  |
|------------------------|-----------------------------|------------------------------|------------------------------|---------------------------|-----------------|-----------------|--------------------------------------------|
|                        | n <sup>a</sup>              | THg <sup>b</sup><br>(ng/L)   | DHg <sup>c</sup><br>(ng/L)   | n                         | THg<br>(ng/L)   | DHg<br>(ng/L)   |                                            |
| Beijing, North China   |                             | 560-14,000                   | n/d <sup>d</sup>             |                           | n/d             | n/d             | Shi et al. (2007) <sup>19</sup>            |
| Guangdong, South China |                             | n/d                          | 10-310                       |                           | n/d             | n/d             | Zhao et al. (2014) <sup>20</sup>           |
| Henan, Central China   |                             | 260-2,800                    | n/d                          |                           | 2.7-410         | n/d             | Mao et al. (2016) <sup>9</sup>             |
| Henan, Central China   |                             | 3,100                        | n/d                          |                           | 170             | n/d             | Chen et al. (2006) <sup>21</sup>           |
| Henan, Central China   |                             | 530-2,300                    | 11-61                        |                           | 11-29           | 3.1-6.9         | Li et al. (2014a) <sup>10</sup>            |
| Minnesota, USA         |                             | 170                          | n/d                          |                           | 3.5             | n/d             | Balogh and Nollet (2008) <sup>22</sup>     |
| Onondaga, USA          |                             | 310                          | n/d                          |                           | 25              | n/d             | Gbondo-Tugbawa et al. (2010) <sup>23</sup> |
| Winnipeg, Canada       |                             | 61                           | n/d                          |                           | 7.0             | n/d             | Bodaly et al. (1998) <sup>24</sup>         |
| Sao Paulo, Brazil      |                             | 130                          | n/d                          |                           | 50              | n/d             | Da et al. (2007) <sup>25</sup>             |
| North China            | 18                          | 4,500±3,200 <sup>e</sup>     | 33±39                        | 13                        | 210±220         | 23±20           | This study                                 |
| Northeast China        | 7                           | 5,000±4,500                  | 20±5.0                       | 4                         | 170±180         | 33±3.3          | This study                                 |
| East China             | 11                          | 3,300±3,000                  | 24±5.7                       | 5                         | 150±120         | 40±18           | This study                                 |
| Central China          | 4                           | 3,200±1,300                  | 26±6.1                       | 2                         | 130±55          | 31±2.0          | This study                                 |
| South China            | 5                           | 2,100±1,600                  | 43±47                        | 1                         | 93±74           | 17±1.5          | This study                                 |
| Southwest China        | 4                           | 3,600±3,000                  | 45±22                        | 3                         | 230±230         | 33±7.9          | This study                                 |
| Northwest China        | 10                          | 3,200±1,400                  | 140±90                       | 3                         | 140±62          | 47±33           | This study                                 |
| Tibetan region         | 3                           | 6,900±6,200                  | 50±33                        | 3                         | 85±43           | 28±5.5          | This study                                 |
| China                  | 62                          | 3,400±2,600                  | 39±24                        | 34                        | 160±130         | 33±12           | This study                                 |
|                        |                             | TMeHg <sup>f</sup><br>(ng/L) | DMeHg <sup>g</sup><br>(ng/L) |                           | TMeHg<br>(ng/L) | DMeHg<br>(ng/L) |                                            |

|                      |    |          |          |    |           |           |                                            |
|----------------------|----|----------|----------|----|-----------|-----------|--------------------------------------------|
| Henan, Central China |    | 1.5-9.6  | n/d      |    | 0.10-1.0  | n/d       | Mao et al. (2016) <sup>9</sup>             |
| Henan, Central China |    | 6.7-50   | 0.55-8.1 |    | 0.42-1.2  | 0.13-0.62 | Li et al. (2014a) <sup>10</sup>            |
| Onondaga, USA        |    | 5.1      | n/d      |    | 1.5       | n/d       | Gbondo-Tugbawa et al. (2010) <sup>23</sup> |
| Winnipeg, Canada     |    | 2.2      | n/d      |    | 0.20      | n/d       | Bodaly et al. (1998) <sup>24</sup>         |
| North China          | 18 | 8.5±9.4  | 4.3±6.4  | 13 | 0.74±0.89 | 0.45±0.61 | This study                                 |
| Northeast China      | 7  | 5.3±4.6  | 2.7±1.6  | 4  | 0.58±0.64 | 0.98±0.80 | This study                                 |
| East China           | 11 | 6.9±6.3  | 4.1±2.8  | 5  | 1.4±1.2   | 1.1±0.65  | This study                                 |
| Central China        | 4  | 5.7±3.2  | 2.2±1.1  | 2  | 1.2±0.70  | 0.41±0.35 | This study                                 |
| South China          | 5  | 2.5±0.65 | 2.0±0.47 | 1  | 0.31±0.28 | 0.25±0.10 | This study                                 |
| Southwest China      | 4  | 11±10    | 5.7±4.6  | 3  | 1.1±1.3   | 1.4±1.4   | This study                                 |
| Northwest China      | 10 | 4.6±3.7  | 1.8±1.5  | 3  | 0.50±0.37 | 0.60±0.26 | This study                                 |
| Tibetan region       | 3  | 14±4.6   | 1.6±1.1  | 3  | 0.69±0.35 | 0.35±0.22 | This study                                 |
| China                | 62 | 6.5±5.5  | 3.4±2.6  | 34 | 1.0±0.82  | 0.80±0.59 | This study                                 |

Note; a) number of MSTPs; b) total Hg, calculated by dissolved Hg (ng/L) + particulate Hg (ng/L); c) dissolved Hg; d) no data; e) mean value ± standard deviation; f) calculated by dissolved MeHg (ng/L) + particulate MeHg (ng/L); g) dissolved MeHg.

## REFERENCES

1. NBS, *China Environmental Statistical Yearbook*. National Bureau of Statistics (NBS): Beijing, China, 2002-2016.
2. NBS, *China Environment Yearbook*. National Bureau of Statistics (NBS): Beijing, China, 2002-2016.
3. Wang, T., Analysis on urban sludge nutrition element and heavy metal content in China. *China Environmental Protection Industry* **2015**, 4, 42-45 (in Chinese).
4. Fang, P.; Cen, C.; Tang, Z.; Tang, Z., Air pollutants emission and their control from sludge incineration: a review. *Environmental Science & Technology* **2012**, 35, (10), 70-80 (in Chinese).
5. Zhang, L.; Li, H.; Su, D., Characteristics and changes of heavy metals in sewage sludge of Chin. *Research of Environmental Sciences* **2013**, 26, (3), 313-319 (in Chinese).
6. Ma, W.; Liu, F.; Cheng, X.; Jing, Y.; Nie, C.; Zhang, P., Environmental evaluation of the application of compost sewage sludge to landscaping as soil amendments: a field experiment on the grassland soils in Beijing. *Desalination and Water Treatment* **2015**, 54, (4-5), 1118-1126.
7. Zhu, J.; Liu, J.; Wang, Z., Discussion on the application of residual sludge of SWUST wastewater treatment plant to orchard. *Journal of Southwest University of Science and Technology* **2008**, 23, (2), 92-96 (in Chinese).
8. He, J.; Wei, C.; Feng, C.; Ren, Y.; Hu, Y.; Wu, C., States distribution of heavy metals in coking wastewater sludge and its potential environmental risks. *Chinese Journal of Environmental Engineering* **2013**, 7, (1), 79-85 (in Chinese).
9. Mao, Y.; Cheng, L.; Ma, B.; Cai, Y., The fate of mercury in municipal wastewater treatment plants in China: significance and implications for environmental cycling. *Journal of hazardous materials* **2016**, 306, 1-7.
10. Li, H.; Mao, Y.; Li, Y.; Ma, Y.; Wang, X.; Song, D., Occurrence and mass balance of mercury at a sewage treatment plant. Part 1: total mercury. *Environmental Chemistry* **2014a**, 33, (7), 1059-1065 (in Chinese).
11. Liu, X.; Ma, B.; Cui, Y.; Li, W.; Liu, J.; Niu, Y., Distribution characteristics of mercury in the sewage treatment plant. *Environmental Science & Technology* **2016**, 39, (9), 125-130 (in Chinese).
12. Li, J.; Luo, G.; Gao, J.; Yuan, S.; Du, J.; Wang, Z., Quantitative evaluation of potential ecological risk of heavy metals in sewage sludge from three wastewater treatment plants in the main urban area of Wuxi, China. *Chemistry and Ecology* **2015**, 31, (3), 235-251.
13. Duan, Y.; Zhao, C.; Wang, Y.; Wu, C., Mercury emission from co-combustion of coal and sludge in a circulating fluidized-bed incinerator. *Energy & Fuels* **2009**, 24, (1), 220-224.
14. Hu, G.; Chen, S.; Cai, X.; Chen, B.; Wang, J.; Sun, J.; Gao, Y., Evaluation on the potential ecological risks of heavy metal pollution in sludge from the sewage treatment plants in chemical industry parks of Jiangsu province. *Resources and Environment of Yangtze River Basin* **2015**, 24, (1), 122-127 (in Chinese).
15. Li, T.; Wang, L.; Xu, X.; Zhan, Q.; Zhao, J., Morphological Characteristics of Heavy Metals in Sewage Sludge and Their Potential Ecological Risk Assessment in Xi'an, (Shannxi). *Urban Environment & Urban Ecology* **2014b**, 27, (4), 6-10 (in Chinese).
16. Li, J.; Chen, J.; Shen, Y.; Shi, K.; Zheng, J.; Ke, Y.; He, P., Chemical analysis and assessment of the heavy metal pollution in the sewage sludge and leaching solution. *Journal of Safety and*

*Environment* **2013**, *13*, (3), 115-121 (in Chinese).

17. Duan, B.; Liu, F.; Zhang, W.; Zheng, H.; Zhang, Q.; Li, X.; Bu, Y., Evaluation and source apportionment of heavy metals (HMs) in sewage sludge of municipal wastewater treatment Plants (WWTPs) in Shanxi, China. *International journal of environmental research and public health* **2015**, *12*, (12), 15807-15818.
18. Liang, Y.; Liu, N., Study on using the HG-AFS method to measure the mercury in the sewage sludge. *Technology & Application* **2007**, (1), 44-46 (in Chinese).
19. Shi, C.; Lin, H.; Ke, Z.; Jian, X.; Lan, R., Research about the contribution of medical industry sources to influent mercury of municipal wastewater. *Research of Environmental Sciences* **2007**, *20*, (5), 129-132 (in Chinese).
20. Zhao, J.; Jiang, Y.; Yan, B.; Wei, C.; Zhang, L.; Ying, G., Multispecies acute toxicity evaluation of wastewaters from different treatment stages in a coking wastewater - treatment plant. *Environmental toxicology and chemistry* **2014**, *33*, (9), 1967-1975.
21. Chen, C.; Zhang, Y.; Hu, X.; Yang, X.; Jia, L.; Chen, Q., The analysis of available ingredients and heavy metal lead and mercury of domestic sewage in Xinxiang city. *Journal of Anhui Agri. Sci.* **2006**, *34*, (22), 5933-5934 (in Chinese).
22. Balogh, S. J.; Nollet, Y. H., Mercury mass balance at a wastewater treatment plant employing sludge incineration with offgas mercury control. *Science of the total environment* **2008**, *389*, (1), 125-131.
23. Gbondo-Tugbawa, S. S.; McAlear, J. A.; Driscoll, C. T.; Sharpe, C. W., Total and methyl mercury transformations and mass loadings within a wastewater treatment plant and the impact of the effluent discharge to an alkaline hypereutrophic lake. *Water research* **2010**, *44*, (9), 2863-2875.
24. Bodaly, R. D.; Rudd, W.; Flett, R. J., Effect of urban sewage treatment on total and methyl mercury concentrations in effluents. *Biogeochemistry* **1998**, *40*, (2-3), 279-291.
25. da Silva Oliveira, A.; Bocio, A.; Trevilato, T. M. B.; Takayanagui, A. M. M.; Domingo, J. L.; Segura-Muñoz, S. I., Heavy metals in untreated/treated urban effluent and sludge from a biological wastewater treatment plant. *Environmental Science and Pollution Research-International* **2007**, *14*, (7), 483-489.
